# Supplementary material for: Peroxisomes are juxtaposed to strategic sites on mitochondria
Source: Royal Society of Chemistry journal article supplement (doi:10.1039/c4mb00001c), 2014-03-25
Supplement: c4mb00001c2.xlsx [file c4mb00001c2.xlsx]

## Sheet: table
List of mutant strains that affected peroxisome structure or transport of peroxisomal proteins (Figure 1)
Mutated ORF	Gene Name	Phenotype	Functional group	SGD description
YPL063W	TIM50	Abberant peroxisomes	Mitochondrial Functions	Essential component of the Translocase of the Inner Mitochondrial membrane (TIM23 complex); acts as receptor for the TIM23 complex guiding incoming precursors from the TOM complex; may control the gating of the Tim23p-Tim17p channel
YAL010C	MDM10	Abberant peroxisomes	Mitochondrial Functions	Subunit of both the ERMES complex and the SAM complex; the ERMES complex links the ER to mitochondria; the SAM complex is mitochondrial sorting and assembly machinery that functions in import and assembly of outer membrane beta-barrel proteins
YOL108C	INO4	Abberant peroxisomes	Nuclear Functions	Transcription factor required for derepression of inositol-choline-regulated genes involved in phospholipid synthesis; forms a complex, with Ino2p, that binds the inositol-choline-responsive element through a basic helix-loop-helix domain
YMR276W	DSK2	Reduced cherry-SKL in peroxisomes	Nuclear Functions	Nuclear-enriched ubiquitin-like polyubiquitin-binding protein; required for spindle pole body (SPB) duplication and for transit through the G2/M phase of the cell cycle; involved in proteolysis; interacts with the proteasome; protein abundance increases in response to DNA replication stress
YFR001W	LOC1	Reduced cherry-SKL in peroxisomes	Nuclear Functions	Nuclear protein involved in asymmetric localization of ASH1 mRNA; binds double-stranded RNA in vitro; constituent of 66S pre-ribosomal particles; relocalizes from nucleus to cytoplasm upon DNA replication stress
YBL006C	LDB7	Abberant peroxisomes	Nuclear Functions	Component of the RSC chromatin remodeling complex; interacts with Rsc3p, Rsc30p, Npl6p, and Htl1p to form a module important for a broad range of RSC functions
YBL079W	NUP170	Reduced cherry-SKL in peroxisomes	Nuclear Functions	Subunit of the inner ring of the nuclear pore complex (NPC); contributes to NPC assembly and nucleocytoplasmic transport; both Nup170p and NUP157p are similar to human Nup155p; NUP170 has a paralog, NUP157, that arose from the whole genome duplication
YAR002W	NUP60	Reduced cherry-SKL in peroxisomes	Nuclear Functions	FG-nucleoporin component of central core of the nuclear pore complex (NPC); contributes directly to nucleocytoplasmic transport and maintenance of the NPC permeability barrier and is involved in gene tethering at the nuclear periphery; relocalizes to the cytosol in response to hypoxia; both NUP1 and NUP60 are homologous to human NUP153
YBR081C	SPT7	Reduced cherry-SKL in peroxisomes	Nuclear Functions	Subunit of the SAGA transcriptional regulatory complex; involved in proper assembly of the complex; also present as a C-terminally truncated form in the SLIK/SALSA transcriptional regulatory complex
YBR090C-A	NHP6B	Reduced cherry-SKL in peroxisomes	Nuclear Functions	High-mobility group (HMG) protein, binds to and remodels nucleosomes; involved in recruiting FACT and other chromatin remodelling complexes to the chromosomes; functionally redundant with Nhp6Ap; homologous to mammalian HMGB1 and HMGB2; NHP6B has a paralog, NHP6A, that arose from the whole genome duplication
YDR432W	NPL3	Abberant peroxisomes	Nuclear Functions	RNA-binding protein; promotes elongation, regulates termination, and carries poly(A) mRNA from nucleus to cytoplasm; has a role in repressing translation initiation by binding eIF4G; required for pre-mRNA splicing; may have a role in telomere maintenance; dissociation from mRNAs promoted by Mtr10p; phosphorylated by Sky1p in the cytoplasm; protein abundance increases in response to DNA replicatio…
YGR063C	SPT4	Reduced cherry-SKL in peroxisomes	Nuclear Functions	Component of the universally conserved Spt4/5 complex (DSIF complex); the complex has multiple roles in concert with RNA polymerases I and II, including regulation of transcription elongation, RNA processing, quality control, and transcription-coupled DNA repair; Spt4p also localizes to kinetochores and heterochromatin and affects chromosome dynamics and silencing; required for transcription thro…
YJL176C	SWI3	Reduced cherry-SKL in peroxisomes	Nuclear Functions	Subunit of the SWI/SNF chromatin remodeling complex; SWI/SNF regulates transcription by remodeling chromosomes; contains SANT domain that is required for SWI/SNF assembly; is essential for displacement of histone H2A-H2B dimers during ATP-dependent remodeling; required for transcription of many genes, including ADH1, ADH2, GAL1, HO, INO1 and SUC2; relocates to the cytosol under hypoxic conditions
YLR358C		Reduced cherry-SKL in peroxisomes	Nuclear Functions	Protein of unknown function; expressed at both mRNA and protein levels; partially overlaps ORF RSC2/YLR357W
YNL136W	EAF7	Reduced cherry-SKL in peroxisomes	Nuclear Functions	Subunit of the NuA4 histone acetyltransferase complex; NuA4 acetylates the N-terminal tails of histones H4 and H2A
YNL199C	GCR2	Reduced cherry-SKL in peroxisomes	Nuclear Functions	Transcriptional activator of genes involved in glycolysis; interacts and functions with the DNA-binding protein Gcr1p
YOR123C	LEO1	Reduced cherry-SKL in peroxisomes	Nuclear Functions	Component of the Paf1 complex; which associates with RNA polymerase II and is involved in histone methylation; plays a role in regulating Ty1 transposition; involved in transcription elongation as demonstrated by the G-less-based run-on (GLRO) assay
YDR065W	RRG1	Reduced cherry-SKL in peroxisomes	Other/Unknown	Protein of unknown function; required for vacuolar acidification and mitochondrial genome maintenance; the authentic, non-tagged protein is detected in highly purified mitochondria in high-throughput studies
YIL090W	ICE2	Reduced cherry-SKL in peroxisomes	Other/Unknown	Integral ER membrane protein with type-III transmembrane domains; required for maintenance of ER zinc homeostasis; necessary for efficient targeting of Trm1p tRNA methyltransferase to inner nuclear membrane; mutations cause defects in cortical ER morphology in both the mother and daughter cells
YEL043W		Reduced cherry-SKL in peroxisomes	Other/Unknown	Predicted cytoskeleton protein involved in intracellular signalling based on quantitative analysis of protein-protein interaction maps; may interact with ribosomes, based on co-purification studies; contains fibronectin type III domain fold
YFR012W	DCV1	Reduced cherry-SKL in peroxisomes	Other/Unknown	Protein of unknown function; deletion mutant shows strong genetic interaction with cdc28-as1 mutant in the presence of 1-NM-PP1; DCV1 has a paralog, YOL019W, that arose from the whole genome duplication
YPL068C		Reduced cherry-SKL in peroxisomes	Other/Unknown	Protein of unknown function; green fluorescent protein (GFP)-fusion protein localizes to the nucleus and is induced in response to the DNA-damaging agent MMS
YLL038C	ENT4	Reduced cherry-SKL in peroxisomes	Other/Unknown	Protein of unknown function; contains an N-terminal epsin-like domain; proposed to be involved in the trafficking of Arn1p in the absence of ferrichrome
YEL031W	SPF1	GFP-Ant1 in mitochondria	Other/Unknown	P-type ATPase, ion transporter of the ER membrane; required to maintain normal lipid composition of intracellular compartments and proper targeting of mitochondrial outer membrane tail-anchored proteins; involved in ER function and Ca2+ homeostasis; required for regulating Hmg2p degradation; confers sensitivity to a killer toxin (SMKT) produced by Pichia farinosa KK1
YDL065C	PEX19	Reduced/No peroxisomes	Peroxisomal Functions	Chaperone and import receptor for newly-synthesized class I peroxisomal membrane proteins (PMPs), binds PMPs in the cytoplasm and delivers them to the peroxisome for subsequent insertion into the peroxisomal membrane
YOL044W	PEX15	Reduced/No peroxisomes	Peroxisomal Functions	Phosphorylated tail-anchored type II integral peroxisomal membrane protein required for peroxisome biogenesis, cells lacking peroxisomes15p mislocalize peroxisomal matrix proteins to cytosol, overexpression results in impaired peroxisome assembly
YMR026C	PEX12	Reduced cherry-SKL in peroxisomes	Peroxisomal Functions	C3HC4-type RING-finger peroxin and E3 ubiquitin ligase, required for peroxisome biogenesis and peroxisomal matrix protein import; forms translocation subcomplex with peroxisomes2p and peroxisomes10p; mutations in human homolog cause peroxisomal disorder
YJL210W	PEX2	Reduced cherry-SKL in peroxisomes	Peroxisomal Functions	RING-finger peroxin and E3 ubiquitin ligase, peroxisomal membrane protein with a C-terminal zinc-binding RING domain, forms translocation subcomplex with peroxisomes10p and peroxisomes12p which functions in peroxisomal matrix protein import
YDR265W	PEX10	Reduced cherry-SKL in peroxisomes	Peroxisomal Functions	Peroxisomal membrane E3 ubiquitin ligase, required for for Ubc4p-dependent peroxisomes5p ubiquitination and peroxisomal matrix protein import; contains zinc-binding RING domain; mutations in human homolog cause various peroxisomal disorders
YKL197C	PEX1	Reduced/No peroxisomes	Peroxisomal Functions	AAA-peroxin that heterodimerizes with AAA-peroxin peroxisomes6p and participates in the recycling of peroxisomal signal receptor peroxisomes5p from the peroxisomal membrane to the cystosol; induced by oleic acid and upregulated during anaerobiosis
YLR191W	PEX13	Reduced cherry-SKL in peroxisomes	Peroxisomal Functions	Integral peroxisomal membrane protein required for translocation of peroxisomal matrix proteins, interacts with the PTS1 signal recognition factor peroxisomes5p and the PTS2 signal recognition factor peroxisomes7p, forms a complex with peroxisomes14p and peroxisomes17p
YNL214W	PEX17	Reduced cherry-SKL in peroxisomes	Peroxisomal Functions	Peroxisomal membrane peroxin and subunit of the docking complex that facilitates the import of peroxisomal matrix proteins; required for peroxisome biogenesis
YDR244W	PEX5	Reduced cherry-SKL in peroxisomes	Peroxisomal Functions	Peroxisomal membrane signal receptor for the C-terminal tripeptide signal sequence (PTS1) of peroxisomal matrix proteins, required for peroxisomal matrix protein import; also proposed to have PTS1-receptor independent functions
YGL153W	PEX14	Reduced cherry-SKL in peroxisomes	Peroxisomal Functions	Peroxisomal membrane peroxin that is a central component of the peroxisomal protein import machinery; interacts with both PTS1 (peroxisomes5p) and PTS2 (peroxisomes7p), peroxisomal matrix protein signal recognition factors and membrane receptor peroxisomes13p
YGR133W	PEX4	Reduced cherry-SKL in peroxisomes	Peroxisomal Functions	Peroxisomal ubiquitin conjugating enzyme required for peroxisomal matrix protein import and peroxisome biogenesis
YGR077C	PEX8	Reduced cherry-SKL in peroxisomes	Peroxisomal Functions	Intraperoxisomal organizer of the peroxisomal import machinery, tightly associated with the lumenal face of the peroxisomal membrane, essential for peroxisome biogenesis, binds PTS1-signal receptor peroxisomes5p
YOL147C	PEX11	Reduced cherry-SKL in peroxisomes	Peroxisomal Functions	Peroxisomal membrane protein required for medium-chain fatty acid oxidation and peroxisome proliferation, possibly by inducing membrane curvature; localization regulated by phosphorylation; transcription regulated by Adr1p and Pip2p-Oaf1p
YPL112C	PEX25	Reduced/No peroxisomes	Peroxisomal Functions	Peripheral peroxisomal membrane peroxin required for the regulation of peroxisome size and maintenance, recruits GTPase Rho1p to peroxisomes, induced by oleate, interacts with homologous protein peroxisomes27p
YDR329C	PEX3	Reduced/No peroxisomes	Peroxisomal Functions	Peroxisomal membrane protein (PMP) required for proper localization and stability of PMPs; anchors peroxisome retention factor Inp1p at the peroxisomal membrane; interacts with peroxisomes19p
YHR150W	PEX28	Reduced cherry-SKL in peroxisomes	Peroxisomal Functions	Peroxisomal integral membrane peroxin, involved in the regulation of peroxisomal size, number and distribution; genetic interactions suggest that peroxisomes28p and peroxisomes29p act at steps upstream of those mediated by peroxisomes30p, peroxisomes31p, and peroxisomes32p
YIR004W	DJP1	Abberant peroxisomes	Peroxisomal Functions	Cytosolic J-domain-containing protein, required for peroxisomal protein import and involved in peroxisome assembly, homologous to E. coli DnaJ
YPL002C	SNF8	Reduced cherry-SKL in peroxisomes	Protein Targeting	Component of the ESCRT-II complex; ESCRT-II is involved in ubiquitin-dependent sorting of proteins into the endosome; appears to be functionally related to SNF7; involved in glucose derepression
YNL064C	YDJ1	Reduced/No peroxisomes	Protein Targeting	Type I HSP40 co-chaperone; involved in regulation of HSP90 and HSP70 functions; critical for determining cell size at Start as a function of growth rate; involved in protein translocation across membranes; member of the DnaJ family
YLL039C	UBI4	Reduced cherry-SKL in peroxisomes	Protein Targeting	Ubiquitin; becomes conjugated to proteins, marking them for selective degradation via the ubiquitin-26S proteasome system; essential for the cellular stress response; encoded as a polyubiquitin precursor comprised of 5 head-to-tail repeats; protein abundance increases in response to DNA replication stress
YBR082C	UBC4	Reduced cherry-SKL in peroxisomes	Protein Targeting	Ubiquitin-conjugating enzyme (E2); mediates degradation of abnormal or excess proteins, including calmodulin and histone H3; interacts with many SCF ubiquitin protein ligases; component of the cellular stress response; UBC4 has a paralog, UBC5, that arose from the whole genome duplication
YLR088W	GAA1	Abberant peroxisomes	Protein Targeting	Subunit of the GPI (glycosylphosphatidylinositol):protein transamidase complex, removes the GPI-anchoring signal and attaches GPI to proteins in the ER
YGR227W	DIE2	Abberant peroxisomes	Protein Targeting	Dolichyl-phosphoglucose-dependent alpha-1,2 glucosyltransferase of the ER, functions in the pathway that synthesizes the dolichol-linked oligosaccharide precursor for N-linked protein glycosylation, has a role in regulation of ITR1 and INO1
YMR235C	RNA1	Abberant peroxisomes	Protein Targeting	GTPase activating protein (GAP) for Gsp1p; involved in nuclear transport
YLR066W	SPC3	Abberant peroxisomes	Protein Targeting	Subunit of signal peptidase complex (Spc1p, Spc2p, Spc3p, Sec11p), which catalyzes cleavage of N-terminal signal sequences of proteins targeted to the secretory pathway; homologous to mammalian SPC22/23
YCR009C	RVS161	Reduced/No peroxisomes	Protein Targeting	Amphiphysin-like lipid raft protein; interacts with Rvs167p and regulates polarization of the actin cytoskeleton, endocytosis, cell polarity, cell fusion and viability following starvation or osmotic stress
YLR079W	SIC1	Reduced cherry-SKL in peroxisomes	Signalling/Metabolism	Cyclin-dependent kinase inhibitor (CKI); inhibitor of Cdc28-Clb kinase complexes that controls G1/S phase transition, preventing premature S phase and ensuring genomic integrity; phosphorylation targets Sic1p for SCF(CDC4)-dependent turnover; functional homolog of mammalian Kip1
YOR256C	TRE2	Abberant peroxisomes	Signalling/Metabolism	Transferrin receptor-like protein; functions with Tre1p to regulate ubiquitylation and vacuolar degradation of the metal transporter Smf1p; inviability of null mutant in systematic studies is due to proximity to CDC31; TRE2 has a paralog, TRE1, that arose from the whole genome duplication
YHR025W	THR1	Reduced cherry-SKL in peroxisomes	Signalling/Metabolism	Homoserine kinase; conserved protein required for threonine biosynthesis; expression is regulated by the GCN4-mediated general amino acid control pathway
YPL158C	AIM44	Reduced cherry-SKL in peroxisomes	Signalling/Metabolism	Protein that regulates Cdc42p and Rho1p; functions in the late steps of cytokinesis and cell separation; sustains Rho1p at the cell division site after actomyosin ring contraction; inhibits the activation of Cdc42-Cla4 at the cell division site to prevent budding inside the old bud neck; transcription is regulated by Swi5p; null mutant displays elevated frequency of mitochondrial genome loss; rel…
YOL078W	AVO1	Abberant peroxisomes	Signalling/Metabolism	Component of a membrane-bound complex containing the Tor2p kinase and other proteins, which may have a role in regulation of cell growth
YJR105W	ADO1	Abberant peroxisomes	Signalling/Metabolism	Adenosine kinase; required for the utilization of S-adenosylmethionine (AdoMet); may be involved in recycling adenosine produced through the methyl cycle
