# Supplementary material for: Peroxisomes are juxtaposed to strategic sites on mitochondria
Source: Royal Society of Chemistry journal article supplement (doi:10.1039/c4mb00001c), 2014-03-25
Supplement: c4mb00001c3.xlsx [file c4mb00001c3.xlsx]

## Sheet: Hits List
List of strains whose GFP tagged proteins were affected by SPF1 loss (Figure 2)
ORF	Protein Name	Localization in Control	Localization in Dspf1	SGD description
YGR121C	MEP1	Cell periphery	Cell periphery and ER	Ammonium permease; belongs to a ubiquitous family of cytoplasmic membrane proteins that transport only ammonium (NH4+); expression is under the nitrogen catabolite repression regulation; MEP1 has a paralog, MEP3, that arose from the whole genome duplication
YNL142W	MEP2	Cell periphery	Cell periphery and ER	Ammonium permease involved in regulation of pseudohyphal growth; belongs to a ubiquitous family of cytoplasmic membrane proteins that transport only ammonium (NH4+); expression is under the nitrogen catabolite repression regulation
YKR093W	PTR2	Cell periphery	Cell periphery and ER	Integral membrane peptide transporter; mediates transport of di- and tri-peptides; conserved protein that contains 12 transmembrane domains; PTR2 expression is regulated by the N-end rule pathway via repression by Cup9p
YNL149C	PGA2	ER	Cytoplasm	Essential protein required for maturation of Gas1p and Pho8p; involved in protein trafficking; GFP-fusion protein localizes to the ER and YFP-fusion protein to the nuclear envelope-ER network; null mutants have a cell separation defect
YML098W	TAF13	Low signal	Cytoplasm	TFIID subunit (19 kDa); involved in RNA polymerase II transcription initiation, similar to histone H4 with atypical histone fold motif of Spt3-like transcription factors
YMR307W	GAS1	Mitochondria	ER	Beta-1,3-glucanosyltransferase; required for cell wall assembly and also has a role in transcriptional silencing; localizes to the cell surface via a glycosylphosphatidylinositol (GPI) anchor; also found at the nuclear periphery
YMR256C	COX7	Mitochondria	ER	Subunit VII of cytochrome c oxidase (Complex IV); Complex IV is the terminal member of the mitochondrial inner membrane electron transport chain
YML038C	YMD8	Puncta	Reduced number of puncta and ER	Putative nucleotide sugar transporter; has similarity to Vrg4p
YEL036C	ANP1	Puncta	Reduced number of puncta and cytoplasm	Subunit of the alpha-1,6 mannosyltransferase complex; type II membrane protein; has a role in retention of glycosyltransferases in the Golgi; involved in osmotic sensitivity and resistance to aminonitrophenyl propanediol
YJL183W	MNN11	Puncta	Reduced number of puncta	Subunit of a Golgi mannosyltransferase complex; this complex also contains Anp1p, Mnn9p, Mnn10p, and Hoc1p, and mediates elongation of the polysaccharide mannan backbone; has homology to Mnn10p
YJR075W	HOC1	Puncta	Reduced number of puncta	Alpha-1,6-mannosyltransferase; involved in cell wall mannan biosynthesis; subunit of a Golgi-localized complex that also contains Anp1p, Mnn9p, Mnn11p, and Mnn10p; identified as a suppressor of a cell lysis sensitive pkc1-371 allele
YER157W	COG3	Puncta	Reduced number of puncta	Essential component of the conserved oligomeric Golgi complex (Cog1p through Cog8p), a cytosolic tethering complex that functions in protein trafficking to mediate fusion of transport vesicles to Golgi compartments
YMR237W	BCH1	Puncta	Puncta and cytoplasm	Member of the ChAPs family (Chs5p-Arf1p-binding proteins); members include Bch1p, Bch2p, Bud7p, and Chs6p; ChAPs family proteins form the exomer complex with Chs5p to mediate export of specific cargo proteins from the Golgi to the plasma membrane; may interact with ribosomes; protein abundance increases and forms cytoplasmic foci in response to DNA replication stress; BCH1 has a paralog, BUD7, th…
YBR042C	CST26	Puncta	No signal	Putative transferase involved in phospholipid biosynthesis; required for incorporation of stearic acid into phosphatidylinositol; affects chromosome stability when overexpressed; CST26 has a paralog, YDR018C, that arose from the whole genome duplication
YLR100W	ERG27	Puncta	Puncta and ER	3-keto sterol reductase; catalyzes the last of three steps required to remove two C-4 methyl groups from an intermediate in ergosterol biosynthesis; mutants are sterol auxotrophs
YGR183C	QCR9	Puncta	Puncta and ER	Subunit 9 of ubiquinol cytochrome-c reductase (Complex III); Complex III is a component of the mitochondrial inner membrane electron transport chain; required for electron transfer at the ubiquinol oxidase site of the complex
YDR329C	PEX3	Puncta	Reduced number of puncta	Peroxisomal membrane protein (PMP) required for proper localization and stability of PMPs; anchors peroxisome retention factor Inp1p at the peroxisomal membrane; interacts with Pex19p
YGL225W	VRG4	Puncta	Reduced number of puncta and ER	Golgi GDP-mannose transporter; regulates Golgi function and glycosylation in Golgi; VRG4 has a paralog, HVG1, that arose from the whole genome duplication
YDR483W	KRE2	Puncta	Reduced number of puncta and cytoplasm	Alpha1,2-mannosyltransferase of the Golgi; involved in protein mannosylation; KRE2 has a paralog, KTR6, that arose from the whole genome duplication
YML115C	VAN1	Puncta	Reduced number of puncta	Component of the mannan polymerase I; complex contains Van1p and Mnn9p and is involved in the first steps of mannan synthesis; mutants are vanadate-resistant
YDL015C	TSC13	Puncta and ER	ER only	Enoyl reductase; catalyzes the last step in each cycle of very long chain fatty acid elongation; localizes to the ER, highly enriched in a structure marking nuclear-vacuolar junctions; coimmunoprecipitates with elongases Fen1p and Sur4p; protein increases in abundance and relative distribution to ER foci increases upon DNA replication stress
YGR175C	ERG1	Puncta and ER	ER only	Squalene epoxidase; catalyzes the epoxidation of squalene to 2,3-oxidosqualene; plays an essential role in the ergosterol-biosynthesis pathway and is the specific target of the antifungal drug terbinafine
YML067C	ERV41	Puncta and ER	ER only	Protein localized to COPII-coated vesicles; forms a complex with Erv46p; involved in the membrane fusion stage of transport; has homology to human ERGIC2 (PTX1) protein
